# Supplementary material
Source: PubMed Central journal article supplement (PMC2801747)
Supplement: mmc1.pdf [file mmc1.pdf]

## Supplemental Information

# Highly Punctuated Patterns of Population Structure on the X Chromosome and Implications

## for African Evolutionary History

Charla A. Lambert, Caitlin F. Connelly, Jennifer Madeoy, Ruolan Qiu, Maynard V. Olson, and Joshua M. Akey

**Table S1. Samples Used for the *ILIRAPL2* Resequencing**

| Population                  | Samples | Male | Female | Coriell IDs                                                                                                                                                                                                   |
|-----------------------------|---------|------|--------|---------------------------------------------------------------------------------------------------------------------------------------------------------------------------------------------------------------|
| Yoruban                     | 10      | 6    | 4      | NA18857, NA18860, NA18863,<br>NA18869, NA18872, NA18911,<br>NA18875, NA18930, NA19094,<br>NA19097                                                                                                             |
| Biaka Pygmy                 | 5       | 2    | 3      | NA10469, NA10470, NA10471,<br>NA10472, NA10473                                                                                                                                                                |
| Mbuti Pygmy                 | 5       | 3    | 2      | NA10492, NA10494, NA10495,<br>NA10493, NA10496                                                                                                                                                                |
| South-of-the-Sahara African | 9       | 6    | 3      | NA17342, NA17343, NA17345,<br>NA17346, NA17347, NA17349,<br>NA17341, NA17344, NA17348                                                                                                                         |
| Middle Eastern              | 10      | 6    | 4      | NA17043, NA17045, NA17046,<br>NA17047, NA17049, NA17050,<br>NA17041, NA17042, NA17044,<br>NA17048                                                                                                             |
| European                    | 21      | 11   | 10     | NA07349, NA10830, NA10842,<br>NA10845, NA10848, NA10851,<br>NA10853, NA10857, NA10858,<br>NA10860, NA17201, NA06990,<br>NA07019, NA07348, NA10831,<br>NA10843, NA10844, NA10850,<br>NA10852, NA10854, NA10861 |
| Han Chinese                 | 21      | 7    | 14     | NA17736, NA17737, NA17742,<br>NA17743, NA17749, NA17753,<br>NA17755, NA17733, NA17734,<br>NA17735, NA17738, NA17739,<br>NA17740, NA17741, NA17744,<br>NA17745, NA17746, NA17747,<br>NA17752, NA17754, NA17756 |
| Southeast Asian             | 10      | 5    | 5      | NA17082, NA17085, NA17088,<br>NA17089, NA17090, NA17081,<br>NA17083, NA17084, NA17086,<br>NA17087                                                                                                             |

|                               |     |    |     |                                                                                                   |
|-------------------------------|-----|----|-----|---------------------------------------------------------------------------------------------------|
| Andean South American         | 10  | 3  | 7   | NA17301, NA17302, NA17309,<br>NA17303, NA17304, NA17305,<br>NA17306, NA17307, NA17308,<br>NA17310 |
| Total number of X chromosomes | 153 | 49 | 104 |                                                                                                   |
| African                       | 41  | 17 | 24  |                                                                                                   |
| Non-African                   | 112 | 32 | 80  |                                                                                                   |

**Table S2. Chromosomal Distributions of  $F_{ST}$  Values**

| Chr       | HapMap         |               |                 |                             | Perlegen       |               |                 |                             |
|-----------|----------------|---------------|-----------------|-----------------------------|----------------|---------------|-----------------|-----------------------------|
|           | Number of SNPs | Mean $F_{ST}$ | Median $F_{ST}$ | 99 <sup>th</sup> Percentile | Number of SNPs | Mean $F_{ST}$ | Median $F_{ST}$ | 99 <sup>th</sup> Percentile |
| 1         | 247873         | 0.125         | 0.090           | 0.519                       | 107520         | 0.097         | 0.067           | 0.447                       |
| 2         | 275882         | 0.132         | 0.097           | 0.549                       | 117167         | 0.103         | 0.070           | 0.488                       |
| 3         | 210413         | 0.130         | 0.096           | 0.527                       | 73283          | 0.096         | 0.067           | 0.439                       |
| 4         | 199688         | 0.128         | 0.093           | 0.535                       | 93938          | 0.094         | 0.064           | 0.443                       |
| 5         | 204756         | 0.124         | 0.091           | 0.520                       | 86816          | 0.098         | 0.069           | 0.458                       |
| 6         | 222189         | 0.119         | 0.086           | 0.513                       | 71492          | 0.098         | 0.068           | 0.461                       |
| 7         | 173614         | 0.125         | 0.091           | 0.535                       | 68746          | 0.099         | 0.069           | 0.453                       |
| 8         | 178093         | 0.130         | 0.096           | 0.530                       | 81846          | 0.106         | 0.073           | 0.484                       |
| 9         | 148422         | 0.124         | 0.090           | 0.513                       | 46450          | 0.094         | 0.064           | 0.431                       |
| 10        | 168333         | 0.124         | 0.090           | 0.527                       | 62715          | 0.109         | 0.075           | 0.489                       |
| 11        | 157334         | 0.120         | 0.087           | 0.516                       | 54153          | 0.096         | 0.068           | 0.438                       |
| 12        | 148308         | 0.123         | 0.089           | 0.524                       | 52000          | 0.100         | 0.069           | 0.461                       |
| 13        | 126937         | 0.121         | 0.088           | 0.510                       | 56526          | 0.100         | 0.070           | 0.462                       |
| 14        | 100618         | 0.124         | 0.093           | 0.513                       | 46336          | 0.097         | 0.069           | 0.443                       |
| 15        | 86962          | 0.135         | 0.100           | 0.554                       | 35657          | 0.103         | 0.070           | 0.471                       |
| 16        | 86909          | 0.126         | 0.093           | 0.522                       | 33327          | 0.098         | 0.070           | 0.442                       |
| 17        | 70407          | 0.133         | 0.095           | 0.561                       | 26613          | 0.105         | 0.072           | 0.456                       |
| 18        | 94610          | 0.120         | 0.089           | 0.508                       | 41766          | 0.093         | 0.066           | 0.419                       |
| 19        | 43942          | 0.123         | 0.090           | 0.505                       | 11910          | 0.098         | 0.070           | 0.442                       |
| 20        | 77486          | 0.126         | 0.090           | 0.528                       | 25997          | 0.097         | 0.069           | 0.466                       |
| 21        | 39691          | 0.126         | 0.093           | 0.519                       | 25583          | 0.096         | 0.068           | 0.430                       |
| 22        | 40621          | 0.126         | 0.091           | 0.544                       | 16560          | 0.096         | 0.068           | 0.437                       |
| Autosomes | 3103088        | 0.126         | 0.092           | 0.527                       | 1236401        | 0.099         | 0.069           | 0.458                       |
| X         | 91301          | 0.194         | 0.136           | 0.811                       | 26937          | 0.156         | 0.112           | 0.680                       |
